# Supplementary material
Source: PubMed Central journal article supplement (PMC5407438)
Supplement: NIHMS72405-supplement-Supplementary_Tables_7-10.pdf [file NIHMS72405-supplement-Supplementary_Tables_7-10.pdf]

**Supplementary Table 7: List of primers used for qChIP experiments.  
For PC, PH, PSC, SU(Z)12 and E(Z) proteins:**

| Category           | Gene         | Name                | Sequence                 |
|--------------------|--------------|---------------------|--------------------------|
| Negative controls  | PGRP-LE      | PGRPnasc_AS1        | CTTACTCAAAACCGAAGAGATCG  |
|                    |              | PGRPnasc_S1         | CCTGGTGAATGATAGCTTACTCTG |
|                    | msta TSS/k27 | Msta-k27_S          | CTATGTCTCGGGTGGCAAACAC   |
|                    |              | Msta-k27_AS         | GCAGCTGATAGACGTCCACTTG   |
|                    | Cp36         | cp36-Ex2_s          | ACTCGAGGAGTACGTGAATGTG   |
|                    |              | cp36-Ex2_as         | TATCCTCGGAGTTCTTCAGCTT   |
| Canonical targets  | AntP         | AntpPRE1_sens       | TGGCCGAGTTTATATCGAAGCG   |
|                    |              | AntpPRE2_as         | CGGCCAACTTGTGTTGTTGTTTC  |
|                    | bxd          | bxd_AS              | CGTTTTAAGTGCGACTGAG      |
|                    |              | bxd_S               | AAGGCGAAAGAGAGCAC        |
| Reinforced targets | Dan          | dan-phSite2-S       | CATTGTACATTTGGCTGTCACC   |
|                    |              | dan-phSite2-AS      | GTCAGTTGGTCTGCCTTGGTAT   |
|                    | DanR         | danr-phSite-S       | TTTCGTGAGCAGGACATGAGTA   |
|                    |              | danr-phSite-AS      | ACTCGCAGAAGGATGTGATTGT   |
| Neo PRC1           | Notch        | N1 sense            | ATGGGGAAACTACTCATGCAAG   |
|                    |              | N1 antisense        | TGTTTTCAAATCGGCAGTGTGAC  |
|                    | mys          | Mys-phSite-S        | ACTCCGATAACCAGAGTTCCTT   |
|                    |              | Mys-phSite-AS       | GAGCCTAGGAACAGTGTTCAC    |
|                    | Socs36E      | Socs36E-Phsite-S    | GTAGCACTAGCGGGTGGATAAC   |
|                    |              | Socs36E-Phsite-AS   | AGCCCGTGCTAGAGTATACGAA   |
|                    | Sec61beta    | Sec61beta-Phsite-S  | AGTTGAGTTGCCTTAGCCTGTC   |
|                    |              | Sec61beta-Phsite-AS | CATTTTGGGCTATCTGTTCCCTC  |
|                    | Lk6          | lk6-Phsite-S        | CGGAGGTACCATTTTGGTAGGA   |
|                    |              | lk6-Phsite-AS       | TGAGTTGCGTAGCCATACTACA   |
|                    | tram         | Tram-Phsite-S2      | TGCAAGCTGAGTGTGACAAGAA   |
|                    |              | Tram-Phsite-AS2     | CTGAATCTCAATCGGCACAATC   |
|                    | Stat92E      | Stat92EPCPH2_S      | CGACCAAAGGAAATCCTATCAG   |
|                    |              | Stat92EPCPH2_AS     | TTGTTACATGTGTTTCATCGTC   |

**For H3K27me3, H3K27Ac and H2AK118Ub histone marks:**

| Category           | Gene      | Name             | Sequence                 |
|--------------------|-----------|------------------|--------------------------|
| Negative controls  | PGRP-LE   | pgrpK27ac2_S     | ACATGTCCGTAGTTTTGGCTTC   |
|                    |           | pgrpK27ac2_AS    | CTGCGCATATAATGGTGGATAG   |
| Canonical targets  | Antp      | AntpK27ac2_S     | TCTCTGACGGTGTTTTTGTTTGTG |
|                    |           | AntpK27ac2_AS    | AAATTAGAACCGCAATCAGTCG   |
|                    | bxd       | BxdK27ac2_S      | CAATGGAGAGGCCGTTATAGAG   |
|                    |           | BxdK27ac1_AS     | TGTATCCTATGCAACGAAATGG   |
| Reinforced targets | Dan       | dan_s            | CTCTCTAGCTTGACGCACCTTT   |
|                    |           | dan_as           | AAACTGTTTAGACCCGACATGG   |
|                    | DanR      | danr_s           | GAGAAGCTTAGCCTTGTGGAAT   |
|                    |           | danr_as          | GTGCAGCATGTTGTTGGAGTAG   |
| Neo PRC1           | Notch     | NK27ac2_S        | TGAATGTGTGTGCAACAACG     |
|                    |           | NK27ac1_AS       | GTGTCGCTCTCTCGTTGCTATC   |
|                    | mys       | mysK27ac1_S      | GTGTTTAGTGTGCGAGTGTGTG   |
|                    |           | mysK27ac1_AS     | CCGGAATCCATTGATTTCTTAC   |
|                    | Socs36E   | Socs36EK27ac1_S  | TAGTTGGCAATTTGGCTAAACC   |
|                    |           | Socs36EK27ac1_AS | CTGTGGAATGGAAATAGTGCAG   |
|                    | Sec61beta | Sec61bK27ac2_S   | CAGATTCACGTTTCAGATTCCAC  |
|                    |           | Sec61bK27ac1_AS  | GACGTTGAACTGGCTGGAG      |
|                    | Lk6       | Lk6K27ac1_S      | TAGAGTGAGACAGGCAGAGTGC   |
|                    |           | Lk6K27ac1_AS     | AACAGCGGAGAGCGATAGATAG   |
|                    | tram      | tramK27ac1_S     | CAACGTCTACGTCAGCAAAAATC  |
|                    |           | tramK27ac1_AS    | AAACACACATTTTGCCTTGTTG   |
|                    | Stat92E   | Stat92EK27Ac2_S  | CTTTGGTACACAAACACCAACG   |
|                    |           | Stat92EK27Ac2_AS | TCTAAATTCTCAGTGCGTGTGC   |

**Supplementary Table 8: Number of reads for ChIP-Seq experiments.**

|                  | number of reads<br>aligned | number of reads<br>multiple matches |
|------------------|----------------------------|-------------------------------------|
| Eye_PC_Rep1      | 54797809                   | 11247372                            |
| Eye_PC_Rep2      | 122608760                  | 30313549                            |
| Eye_PH_Rep1      | 52030123                   | 11968341                            |
| Eye_PH_Rep2      | 112559192                  | 26728085                            |
| Eye_K27me3_Rep1  | 55698931                   | 6432969                             |
| Eye_K27me3_Rep2  | 70164119                   | 13553455                            |
| Eye_K27ac_Rep1   | 79056619                   | 9529538                             |
| Eye_K27ac_Rep2   | 87019908                   | 9995255                             |
| Eye_Input_Rep1   | 52136525                   | 12637513                            |
| Eye_Input_Rep2   | 63192819                   | 17319910                            |
| Wing_PC_Rep1     | 62179507                   | 11260312                            |
| Wing_PC_Rep2     | 70560632                   | 13214710                            |
| Wing_PH_Rep1     | 68772886                   | 12334059                            |
| Wing_PH_Rep2     | 62010901                   | 14109375                            |
| Wing_K27me3_Rep1 | 72923868                   | 10680053                            |
| Wing_K27me3_Rep2 | 69250793                   | 10868999                            |
| Wing_Input_Rep1  | 72872798                   | 16428461                            |
| Wing_Input_Rep2  | 67969709                   | 19205709                            |

**Supplementary Table 9: Correlations between ChIP-Seq replicates.**

|             | Spearman |
|-------------|----------|
| Eye PC      | 0,7      |
| Eye PH      | 0,9      |
| Eye K27me3  | 1        |
| Eye K27ac   | 1        |
| Wing PC     | 0,9      |
| Wing PH     | 0,9      |
| Wing K27me3 | 0,9      |

**Supplementary Table 10: List of primers used to generate FISH probes.**

| Gene         | Fragment             | Sequence                      |
|--------------|----------------------|-------------------------------|
| <i>ey</i>    | 1                    | ATTATTCCCTACTAACTAAACCCATC    |
|              |                      | TAAAGTTCCTAAACCCATGC          |
|              | 2                    | GGACGTGGCCTAGTAGAC            |
|              |                      | TACTGCTGATCTTCAATGTGAC        |
|              | 3                    | CGATAAGAAGAACGACGCT           |
|              |                      | CACACGGTTTATAACGTCC           |
|              | 4                    | CTATTGGCAACTCGTTCTCTC         |
|              |                      | AACTGCACTCGCCTAGTA            |
|              | 5                    | TCGAGTTCCTTAGGAACTATAAGAGC    |
|              |                      | TGTGGCGAAGTATGAAGATG          |
|              | 6                    | ATTGAGTCTAACCGATCCATAAG       |
|              |                      | TAACGTGAGATCGGCCT             |
| <i>eya</i>   | 1                    | TATCTCTCGGATGCGGG             |
|              |                      | GGATCTGCTGCTTCAAGG            |
|              |                      | GTGACAGATTTCTTCTGTTGATA       |
|              | 2                    | TCTCTGCCTTAAACTCGGTAG         |
|              |                      | CCTCGCCAATCAATGGAC            |
|              | 3                    | CGCTGGATTCCGATCCTA            |
|              |                      | CCAGGAGTCAGGTTTGAATAG         |
|              | 4                    | AAATTGGGTTAGCCGAGG            |
| <i>hh</i>    |                      | 1                             |
|              | AGTGTTTGAAGTGCACGTAA |                               |
|              | 2                    | GATGAGGTGTGGATCTGTAG          |
|              |                      | GCCGGGAATCAAAGGATA            |
|              | 3                    | TTACCACTTCGAAAGATGGTATAG      |
|              |                      | TGAATGCCACGGGATTAG            |
|              | 4                    | TAGTCAATCGCCCGAAGGA           |
|              |                      | GACGGCTGAACGGTAGA             |
|              | 5                    | GTGTGTTTGACCTCCATACC          |
|              |                      | CCGAAGACTCAGGCACTA            |
| <i>robo3</i> | 1                    | GCATATTTATGATGATTGCCGAC       |
|              |                      | ACAGAGGTACGATTAATTTACCC       |
|              | 2                    | CCCAAGAAAGTAGGCTACG           |
|              |                      | CGCTCCGAGATGTTGTTA            |
|              | 3                    | GTAACGTTCTCTGTAACAGTATTCTA    |
|              |                      | GCTTTGACATTGATAAATTATGCAGACTA |
|              | 4                    | GCTCTTAGCAGCAAATCCA           |
|              |                      | TTGTAAATGAAGACACACGG          |
|              | 5                    | CCCACGCCAACAGTTTA             |
|              |                      | CTGTATTTCAAACCACTCTCGTA       |

|    |   |                        |
|----|---|------------------------|
| vg | 1 | AAAGGCCACATTTGTTCTCATA |
|    |   | CGCGATCACTCACTAGG      |
|    | 2 | GCACTGTAACGAGAATTGAG   |
|    |   | TTTCTGCAGCAGTTGTAGTAT  |
|    | 3 | AAACAACCTGCATTCGGC     |
|    |   | CCAACATTGAGTTGCGGA     |
|    | 4 | TCTTGTGTCGCAAGTCC      |
|    |   | AATTATGATCGTGTCTAAGGGT |
|    | 5 | CCAAACTCAAATGATGATGACC |
|    |   | CCGAATCGAATCACCATACT   |
